# Supplementary material for: Interactions between sleep disturbances and Alzheimer’s disease on brain function: a preliminary study combining the static and dynamic functional MRI
Source: PubMed Central journal article supplement (PMC6911090; doi:10.1038/s41598-019-55452-9), 2019-12-13
Supplement: 41598_2019_55452_MOESM1_ESM.pdf [file 41598_2019_55452_MOESM1_ESM.pdf]

1 **Interactions between sleep disturbances and Alzheimer’s**  
2 **disease on brain function: a preliminary study combining**  
3 **the static and dynamic functional MRI**

4 Kaicheng Li<sup>1†</sup>, Xiao Luo<sup>1†</sup>, Qingze Zeng<sup>1</sup>, Yefan Jiaerken<sup>1</sup>, Shuyue Wang<sup>1</sup>, Xiaopei Xu<sup>1</sup>,  
5 Xiaojun Xu<sup>1</sup>, Jingjing Xu<sup>1</sup>, Chao Wang<sup>1</sup>, Jiong Zhou<sup>2</sup>, Peiyu Huang<sup>\*1</sup>, Minming Zhang<sup>\*1</sup>

6  
7 <sup>1</sup>Department of Radiology, 2nd Affiliated Hospital of Zhejiang University School of  
8 Medicine, China

9 <sup>2</sup>Department of Neurology, 2nd Affiliated Hospital of Zhejiang University School of  
10 Medicine, China

11  
12 Corresponding to:

13 \*Prof. Minming Zhang, MD, PhD

14 Department of Radiology, The 2nd Affiliated Hospital of Zhejiang University, School of  
15 Medicine, No.88 Jie-fang Road, Shang-cheng District, Hangzhou, China, 310009; Phone:  
16 86-0571-87315255; Fax: 86-0571-87315255; Email address: zhangminming@zju.edu.cn

17 \*Prof. Peiyu Huang, PhD

18 Department of Radiology, The 2nd Affiliated Hospital of Zhejiang University, School of  
19 Medicine, No.88 Jie-fang Road, Shang-cheng District, Hangzhou, China, 310009; Phone:  
20 86-0571-87315255; Fax: 86-0571-87315255; Email address: hpyzju@foxmail.com

21  
22  
23 **Supplementary Material 1. Flow chart of subjects inclusion**

24 We identified 741 subjects who had sleep-related records in the medical history or  
25 night-time behavioral disturbance assessed by Neuropsychiatric Inventory (NPI) <sup>1</sup> or a brief  
26 questionnaire form of NPI (NPI-Q) <sup>2</sup> from ADNI GO, ADNI 2 and ADNI 3 database before  
27 2018 September. After careful screening, 234 subjects were excluded due to rest-state

28 functional MRI (rsfMRI) data missing; 56 subjects were excluded due to inconformity  
29 between sleep complaint and rsfMRI time; 60 subjects were excluded due to different rsfMRI  
30 scan parameters or bad image quality; 58 subjects were excluded due to abnormal cognitive  
31 performance (Notably, in some samples, we selected data from the follow-up time points to  
32 ensure the time-correspondence of different image data, which may have different diagnosis  
33 from the baseline). Finally, we included 333 subjects undergone rsfMRI, structural scan, and  
34 comprehensive neuropsychological assessments. According to their cognition state, these  
35 subjects can be further grouped into normal control (NC), subjects with mild cognitive  
36 impairment (MCI) and Alzheimer's disease (AD) patients (Figure S1).

37 The inclusion criteria for NC as followed: (a) Mini-Mental State Examination (MMSE)  
38 between 24 and 30 (inclusive); (b) the clinical dementia rating (CDR) score of 0; (c) the  
39 normal Wechsler Memory Scale Logical Memory (WMS-LM), delay recall performance (in  
40 detail:  $\geq 9$  for subjects with 16 or more years of education;  $\geq 5$  for subjects with 8 – 15 years  
41 of education; and  $\geq 3$  for 0 – 7 years of education); (d) non-clinical depression (geriatric  
42 depression scale-15, GDS-15 score  $< 6$ )<sup>3</sup>; and (e) non-demented. The inclusion criteria for  
43 MCI subjects are: having (a) subjective memory complaints, either self-reported, reported by  
44 a study partner, or reported by a clinician; (b) decreased WMS-LM delayed recall  
45 performance; (c) CDR score of 0.5; (d) MMSE score between 24 and 30 (inclusive); and (e)  
46 general cognitive and functional performance sufficiently preserved such that a diagnosis of  
47 dementia could not be made by the site physician at the time of screening<sup>4</sup>. Regarding AD,  
48 the inclusion criteria were: (a) MMSE score of  $\leq 26$ ; (b) CDR  $\geq 0.5$ , and (c) meeting the  
49 NINCDS/ADRDA criteria for probable AD<sup>5</sup>.

50 We excluded subjects with the following manifestations: (a) significant medical,  
 51 neurological, and psychiatric illness; (b) obvious head trauma history; (c) use of  
 52 non-AD-related medication known to influence cerebral function; (d) clinical depression; (e)  
 53 alcohol or drug abuse.

54 Figure S1. Flow chart of subjects inclusion

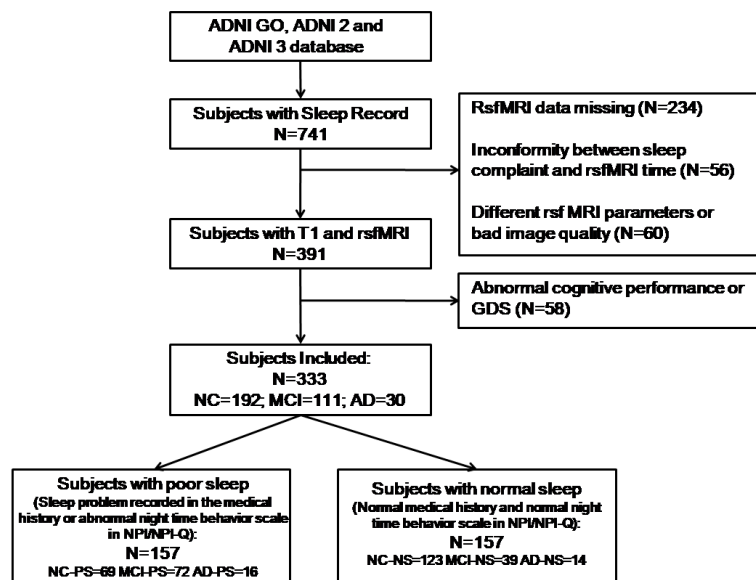

55  
 56 **Abbreviation:** rsfMRI: rest-state functional MRI; GDS: geriatric depression scale; NC: normal control; MCI:  
 57 mild cognitive impairment; AD: Alzheimer's disease; NS: normal sleeper; PS: poor sleeper; NPI:  
 58 Neuropsychiatric Inventory; NPI-Q: a brief questionnaire form of NPI.

59

## 60 Supplementary Material 2

61 We defined sleep quality using medical history (keywords: “insomnia”, “sleep problem”,  
 62 and “sleep apnea”) and night-time behaviour scale in Neuropsychiatric Inventory (NPI) or a  
 63 brief questionnaire form of NPI (NPI-Q), as previously described <sup>2,6-8</sup>. Specifically, we  
 64 defined subjects with sleep disturbance (including sleep problems recorded in the medical  
 65 history or abnormal NPI/NPI-Q) as the poor sleeper; by contrast, subjects with both normal  
 66 medical history and NPI/NPI-Q were defined as the normal sleeper.

67 To be specific, NPI or NPI-Q<sup>1,2</sup> is a caregiver-based tool which assesses the possible  
68 presence of neuropsychiatric symptoms in dementia cases, including night-time behavioural  
69 disturbances. For detail, NPI/NPI-Q consists of 12 items (including delusions, hallucinations,  
70 agitation/aggression, dysphoria/depression, anxiety, euphoria/elation, apathy/indifference,  
71 disinhibition, irritability/lability, aberrant motor behaviors, night-time behavioral disturbances  
72 and appetite/eating disturbances) that the caregiver rates on a scale from 1 to 4 as to whether  
73 there has been no change or some degree of change and a severity range from 1 to 3 in each of  
74 neuropsychiatric symptoms.

75 Thereinto, the 9<sup>th</sup> item of NPI assesses the night-time behavior, which asked like “Does  
76 the patient awaken you during the night, rise too early in the morning, or take excessive naps  
77 during the day?” This item can reflect decreased nighttime sleep and increased daytime sleep,  
78 which both belong to the sleep disturbance and might impair cognition<sup>9</sup>. A sleep disturbance  
79 symptom was considered to be present if a caregiver reported the symptom (the scale score of  
80 the 9<sup>th</sup> item  $\geq 1$ ). Previous studies have used NPI to measure sleep characteristics in MCI or  
81 AD and proved its validity<sup>10-12</sup>.

82

### 83 **Supplementary Material 3: Design matrix of the full factorial model**

84 The interactions between sleep disturbance and disease severity on brain function (both  
85 sALFF and dALFF in a whole-brain voxel-wise way) were assessed with a  $3 \times 2$  full factorial  
86 design, with groups (NC, MCI, and AD) and sleep state (NS and PS) as between-participant  
87 factors. Age, gender, education and FD were employed as covariates (Figure S2, S3).  
88 Figure S2. Design matrix of the full factorial model

**Statistical analysis: Design**

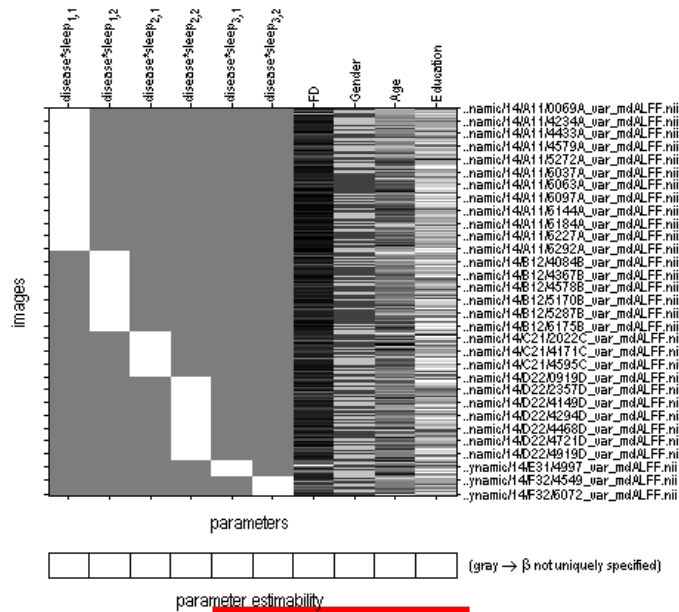

**Design description...**

**Design** : Full factorial  
**Global calculation** : omit  
**Grand mean scaling** : <no grand Mean scaling>  
**Global normalisation** : <no global normalisation>  
**Parameters** : 6 condition, +4 covariate, +0 block, +0 nuisance  
 10 total, leaving 10 degrees of freedom  
 leaving 323 degrees of freedom from 333 images

89

90

91

92 **Supplementary Material 4: The main effect and interaction effect on neuropsychological**  
 93 **performance**

94 Table S1. The demographic and cognitive information of NC

| Demographic Characteristics | NC            |              | P value | T/X <sup>2</sup> |
|-----------------------------|---------------|--------------|---------|------------------|
|                             | NS<br>(N=123) | PS<br>(N=69) |         |                  |
| Age,y, mean (SD)            | 74.02 ± 7.13  | 74.77 ± 6.57 | 0.47    | -0.72            |
| Female, n (%)               | 70/123        | 46/69        | 0.22    | 1.76             |
| Education,y, mean (SD)      | 16.52 ± 2.16  | 16.39 ± 2.43 | 0.70    | 0.38             |

|                                 |                   |                   |               |              |
|---------------------------------|-------------------|-------------------|---------------|--------------|
| <i>Neuropsychiatric Scores</i>  |                   |                   |               |              |
| <b>GDS</b>                      | <b>0.65±0.98</b>  | <b>1.20±1.15</b>  | <b>0.001*</b> | <b>-3.54</b> |
| <i>General mental status</i>    |                   |                   |               |              |
| <b>MMSE</b>                     | <b>29.20±1.06</b> | <b>29.12±1.04</b> | <b>0.59</b>   | <b>0.55</b>  |
| <b>CDR global</b>               | <b>0.00±0.00</b>  | <b>0.00±0.00</b>  | <b>0.46</b>   | <b>0.75</b>  |
| <b>CDR sum</b>                  | <b>0.01±0.00</b>  | <b>0.00±0.00</b>  | <b>0.46</b>   | <b>0.75</b>  |
| <i>Memory function</i>          |                   |                   |               |              |
| <b>WMS-LM immediate</b>         | <b>14.39±3.54</b> | <b>15.13±3.17</b> | <b>0.15</b>   | <b>-1.45</b> |
| <b>WMS-LM delay</b>             | <b>13.38±3.73</b> | <b>14.03±3.46</b> | <b>0.24</b>   | <b>-1.18</b> |
| <b>AVLT sum of trials 1–5</b>   | <b>13.06±2.11</b> | <b>13.36±2.29</b> | <b>0.36</b>   | <b>-0.93</b> |
| <b>AVLT 30min</b>               | <b>7.77±4.23</b>  | <b>8.65±3.54</b>  | <b>0.14</b>   | <b>-1.47</b> |
| <i>Attention</i>                |                   |                   |               |              |
| <b>Log-transformed TMT-A</b>    | <b>1.49±0.13</b>  | <b>1.46±0.11</b>  | <b>0.14</b>   | <b>1.49</b>  |
| <i>Decision-making function</i> |                   |                   |               |              |
| <b>Log-transformed TMT-B</b>    | <b>1.86±0.20</b>  | <b>1.83±0.14</b>  | <b>0.42</b>   | <b>0.81</b>  |
| <i>Language</i>                 |                   |                   |               |              |
| <b>Category verbal fluency</b>  | <b>21.57±5.30</b> | <b>21.97±4.70</b> | <b>0.60</b>   | <b>-0.53</b> |
| <i>Visuospatial processing</i>  |                   |                   |               |              |
| <b>CDT</b>                      | <b>4.75±0.45</b>  | <b>4.74±0.53</b>  | <b>0.84</b>   | <b>0.21</b>  |

95 Data are presented as means ± standard deviations.

96 Abbreviation: NC: normal control; NS: normal sleeper; PS: poor sleeper; GDS: Geriatric Depression Scale;

97 MMSE, Mini-Mental State Examination; CDR: Clinical Dementia Rating; WMS-LM, Wechsler Memory Scale

98 Logical Memory; AVLT, Auditory Verbal Learning Test; TMT, Trail-Making Test; CDT, Clock Drawing Test.

99 \*p<0.05, significant difference between groups

100

101 Table S2. The demographic and cognitive information of MCI

| Demographic characteristics    | MCI          |              | P value | T/X <sup>2</sup> |
|--------------------------------|--------------|--------------|---------|------------------|
|                                | NS<br>(N=39) | PS<br>(N=72) |         |                  |
| Age,y, mean (SD)               | 73.41±8.07   | 73.78±6.72   | 0.80    | -0.25            |
| Female, n (%)                  | 19/39        | 30/72        | 0.52    | 1.30             |
| Education,y, mean (SD)         | 16.23±3.17   | 16.10±2.67   | 0.81    | 0.24             |
| <i>Neuropsychiatric Scores</i> |              |              |         |                  |
| GDS                            | 1.10±1.27    | 1.94±1.76    | 0.01*   | -2.64            |
| <i>General mental status</i>   |              |              |         |                  |
| MMSE                           | 27.77±2.64   | 27.03±3.89   | 0.29    | 1.07             |
| CDR global                     | 0.42±0.24    | 0.49±0.32    | 0.24    | -1.19            |
| CDR sum                        | 1.21±1.45    | 1.53±2.07    | 0.39    | -1.29            |
| <i>Memory function</i>         |              |              |         |                  |
| WMS-LM immediate               | 9.74±4.60    | 10.43±4.39   | 0.46    | -0.75            |
| WMS-LM delay                   | 7.71±5.59    | 8.10±4.98    | 0.72    | -0.36            |
| AVLT sum of trials 1–5         | 11.11±3.63   | 10.42±3.79   | 0.37    | 0.91             |
| AVLT 30min                     | 4.82±3.97    | 4.76±5.57    | 0.95    | 0.06             |
| <i>Attention</i>               |              |              |         |                  |

|                                 |                   |                   |             |              |
|---------------------------------|-------------------|-------------------|-------------|--------------|
| <b>Log-transformed TMT-A</b>    | <b>1.54±0.15</b>  | <b>1.56±0.18</b>  | <b>0.50</b> | <b>-0.67</b> |
| <i>Decision-making function</i> |                   |                   |             |              |
| <b>Log-transformed TMT-B</b>    | <b>1.97±0.22</b>  | <b>1.96±0.24</b>  | <b>0.79</b> | <b>0.27</b>  |
| <i>Language</i>                 |                   |                   |             |              |
| <b>Category verbal fluency</b>  | <b>18.44±5.50</b> | <b>17.69±6.14</b> | <b>0.53</b> | <b>0.63</b>  |
| <i>Visuospatial processing</i>  |                   |                   |             |              |
| <b>CDT</b>                      | <b>4.32±1.02</b>  | <b>4.39±1.00</b>  | <b>0.72</b> | <b>-0.36</b> |

102 Data are presented as means ± standard deviations.

103 Abbreviation: MCI: mild cognitive impairment; NS: normal sleeper; PS: poor sleeper; GDS: Geriatric  
104 Depression Scale; MMSE, Mini-Mental State Examination; CDR: Clinical Dementia Rating; WMS-LM,  
105 Wechsler Memory Scale Logical Memory; AVLT, Auditory Verbal Learning Test; TMT, Trail-Making Test; CDT,  
106 Clock Drawing Test.

107 \*p<0.05, significant difference between groups

108

109 Table S3. The demographic and cognitive information of AD

| <b>Demographic characteristics</b> | <b>AD</b>            |                      | <b>P value</b> | <b>T/X<sup>2</sup></b> |
|------------------------------------|----------------------|----------------------|----------------|------------------------|
|                                    | <b>NS<br/>(N=14)</b> | <b>PS<br/>(N=16)</b> |                |                        |
| <b>Age,y, mean (SD)</b>            | <b>70.76±8.24</b>    | <b>74.66±8.50</b>    | <b>0.21</b>    | <b>-1.27</b>           |
| <b>Female, n(%)</b>                | <b>5/14</b>          | <b>9/16</b>          | <b>0.30</b>    | <b>1.27</b>            |
| <b>Education,y, mean (SD)</b>      | <b>15.57±2.77</b>    | <b>16.38±2.58</b>    | <b>0.42</b>    | <b>-0.82</b>           |
| <i>Neuropsychiatric Scores</i>     |                      |                      |                |                        |
| <b>GDS</b>                         | <b>1.86±0.95</b>     | <b>1.75±1.57</b>     | <b>0.83</b>    | <b>0.22</b>            |
| <i>General mental status</i>       |                      |                      |                |                        |



|                                 |                     |                     |              |              |
|---------------------------------|---------------------|---------------------|--------------|--------------|
| <b>MMSE</b>                     | <b>22.93 ± 2.67</b> | <b>20.81 ± 4.42</b> | <b>0.13</b>  | <b>1.56</b>  |
| <b>CDR global</b>               | <b>0.75 ± 0.26</b>  | <b>1.00 ± 0.55</b>  | <b>0.13</b>  | <b>-1.56</b> |
| <b>CDR sum</b>                  | <b>3.79 ± 1.12</b>  | <b>5.50 ± 3.46</b>  | <b>0.09</b>  | <b>-1.77</b> |
| <i>Memory function</i>          |                     |                     |              |              |
| <b>WMS-LM immediate</b>         | <b>4.25 ± 2.99</b>  | <b>4.27 ± 2.99</b>  | <b>0.99</b>  | <b>-0.02</b> |
| <b>WMS-LM delay</b>             | <b>1.75 ± 2.22</b>  | <b>1.07 ± 1.83</b>  | <b>0.39</b>  | <b>0.88</b>  |
| <b>AVLT sum of trials 1–5</b>   | <b>5.13 ± 3.36</b>  | <b>4.13 ± 3.67</b>  | <b>0.53</b>  | <b>0.65</b>  |
| <b>AVLT 30min</b>               | <b>0.50 ± 0.93</b>  | <b>0.31 ± 1.25</b>  | <b>0.71</b>  | <b>0.37</b>  |
| <i>Attention</i>                |                     |                     |              |              |
| <b>Log-transformed TMT-A</b>    | <b>1.76 ± 0.24</b>  | <b>1.86 ± 0.20</b>  | <b>0.26</b>  | <b>-1.15</b> |
| <i>Decision-making function</i> |                     |                     |              |              |
| <b>Log-transformed TMT-B</b>    | <b>2.10 ± 0.18</b>  | <b>2.35 ± 0.17</b>  | <b>0.02*</b> | <b>-2.57</b> |
| <i>Language</i>                 |                     |                     |              |              |
| <b>Category verbal fluency</b>  | <b>10.50 ± 4.87</b> | <b>12.44 ± 5.81</b> | <b>0.43</b>  | <b>-0.81</b> |
| <i>Visuospatial processing</i>  |                     |                     |              |              |
| <b>CDT</b>                      | <b>3.14 ± 2.12</b>  | <b>3.25 ± 1.57</b>  | <b>0.89</b>  | <b>-0.14</b> |

110 Data are presented as means ± standard deviations.

111 Abbreviation: AD: Alzheimer's disease; NS: normal sleeper; PS: poor sleeper; GDS: Geriatric Depression Scale;

112 MMSE, Mini-Mental State Examination; CDR: Clinical Dementia Rating; WMS-LM, Wechsler Memory Scale

113 Logical Memory; AVLT, Auditory Verbal Learning Test; TMT, Trail-Making Test; CDT, Clock Drawing Test.

114 \*p<0.05, significant difference between groups

115

116 Table S4. The main effect and interaction effect on neuropsychological performance

| <b>Demographic</b> | <b>NC</b> | <b>MCI</b> | <b>AD</b> |  |  | <b>P-value</b> |
|--------------------|-----------|------------|-----------|--|--|----------------|
|--------------------|-----------|------------|-----------|--|--|----------------|

| characteristics                  | NS<br>(N=123) | PS<br>(N=69) | NS<br>(N=39) | PS<br>(N=72) | NS<br>(N=14) | PS<br>(N=16) | P-value<br>Sleep<br>quality | P-value<br>Disease<br>severity | Sleep ×<br>Disease<br>interacti<br>on |
|----------------------------------|---------------|--------------|--------------|--------------|--------------|--------------|-----------------------------|--------------------------------|---------------------------------------|
| <b>MMSE</b>                      | 29.20±1.06    | 29.12±1.04   | 27.77±2.64   | 27.03±3.89   | 22.93±2.67   | 20.81±4.42   | 0.01                        | <0.001                         | 0.10                                  |
| <b>WMS-LM immediate</b>          | 14.39±3.54    | 15.13±3.17   | 9.74±4.60    | 10.43±4.39   | 4.25±2.99    | 4.27±2.99    | 0.48                        | <0.001                         | 0.75                                  |
| <b>WMS-LM delay</b>              | 13.38±3.73    | 14.03±3.46   | 7.71±5.59    | 8.10±4.98    | 1.75±2.22    | 1.07±1.83    | 0.80                        | <0.001                         | 0.65                                  |
| <b>AVLT sum of trials 1–5</b>    | 13.06±2.11    | 13.36±2.29   | 11.11±3.63   | 10.42±3.79   | 5.13±3.36    | 4.13±3.67    | 0.41                        | <0.001                         | 0.31                                  |
| <b>AVLT 30min</b>                | 7.77±4.23     | 8.65±3.54    | 4.82±3.97    | 4.76±5.57    | 0.50±0.93    | 0.31±1.25    | 0.96                        | <0.001                         | 0.55                                  |
| <b>Log-transformed<br/>TMT-A</b> | 1.49±0.13     | 1.46±0.11    | 1.54±0.15    | 1.56±0.18    | 1.76±0.24    | 1.86±0.20    | 0.14                        | <0.001                         | 0.06                                  |
| <b>Log-transformed<br/>TMT-B</b> | 1.86±0.20     | 1.83±0.14    | 1.97±0.22    | 1.96±0.24    | 2.10±0.18    | 2.35±0.17    | 0.12                        | <0.001                         | 0.07                                  |
| <b>Category verbal fluency</b>   | 21.57±5.30    | 21.97±4.70   | 18.44±5.50   | 17.69±6.14   | 10.50±4.87   | 12.44±5.81   | 0.42                        | <0.001                         | 0.44                                  |
| <b>CDT</b>                       | 4.75±0.45     | 4.74±0.53    | 4.32±1.02    | 4.39±1.00    | 3.14±2.12    | 3.25±1.57    | 0.87                        | <0.001                         | 0.87                                  |

117 Data are presented as means ± standard deviations.

118 Abbreviation: AD: Alzheimer's disease; NS: normal sleeper; PS: poor sleeper; GDS: Geriatric Depression Scale;

119 MMSE, Mini-Mental State Examination WMS-LM, Wechsler Memory Scale Logical Memory; AVLT, Auditory

120 Verbal Learning Test; TMT, Trail-Making Test; CDT, Clock Drawing Test.

121

## 122 **Supplementary Material 5: The main effects of disease and sleep**

### 123 **The main effect of disease**

124 As for the static amplitude of low-frequency fluctuation (sALFF) analysis, the main

125 effect of disease was widely observed, especially in the temporal region (Table S5, Figure S3).

126 As for the dynamic ALFF (dALFF) variance analysis, the main effect of disease was widely  
 127 observed in the cerebellum, temporal region and parietal region (Table S5, Figure S4). The  
 128 findings are in line with previous studies on the anatomical location of AD-related changes.

129 Table S5. The main effect of disease

| Neuroimaging<br><br>Metrics | Cluster/peak regions | MNI coordinates |     |     | Extent | Max T |
|-----------------------------|----------------------|-----------------|-----|-----|--------|-------|
|                             |                      | X               | Y   | Z   |        |       |
| sALFF                       | Cerebelum_9_R        | 9               | -42 | -51 | 14     | 11.73 |
|                             | Cerebelum_9_L        | -12             | -45 | -51 | 14     | 11.40 |
|                             | Cerebelum_8_R        | 36              | -54 | -45 | 11     | 12.16 |
|                             | Temporal_Pole_Sup_R  | 36              | 12  | -30 | 10     | 9.15  |
|                             | Temporal_Pole_Sup_L  | -36             | 9   | -27 | 62     | 15.64 |
|                             | Amygdala_R           | 24              | 0   | -21 | 14     | 11.33 |
|                             | Temporal_Inf_L       | -42             | -36 | -18 | 17     | 18.27 |
|                             | Temporal_Inf_R       | 48              | -27 | -27 | 12     | 11.98 |
|                             | Fusiform_L           | -33             | -54 | -6  | 19     | 17.29 |
|                             | Insula_L             | -33             | 18  | 12  | 10     | 12.74 |
|                             | SupraMarginal_R      | 60              | -45 | 24  | 10     | 10.17 |
|                             | Calcarine_R          | 18              | -57 | 6   | 11     | 13.21 |
|                             | Frontal_Mid_R        | 42              | 6   | 39  | 14     | 10.54 |
| Temporal_Sup_R              | 48                   | -24             | 9   | 11  | 10.84  |       |
|                             | Cerebelum_8_L        | -30             | -60 | -54 | 14     | 10.40 |
|                             | Cerebelum_7b_L       | -36             | -48 | -42 | 18     | 15.79 |

|                           |                            |            |            |            |            |              |
|---------------------------|----------------------------|------------|------------|------------|------------|--------------|
| <b>dALFF<br/>variance</b> | <b>Cerebelum_Crus1_L</b>   | <b>-42</b> | <b>-60</b> | <b>-27</b> | <b>27</b>  | <b>12.00</b> |
|                           | <b>Cerebelum_6_R</b>       | <b>36</b>  | <b>-48</b> | <b>-27</b> | <b>71</b>  | <b>15.93</b> |
|                           | <b>Vermis_4_5</b>          | <b>6</b>   | <b>-51</b> | <b>3</b>   | <b>17</b>  | <b>14.03</b> |
|                           | <b>Fusiform_L</b>          | <b>-36</b> | <b>-15</b> | <b>-30</b> | <b>23</b>  | <b>13.54</b> |
|                           | <b>Temporal_Inf_L</b>      | <b>-42</b> | <b>-39</b> | <b>-18</b> | <b>80</b>  | <b>16.92</b> |
|                           | <b>Temporal_Inf_R</b>      | <b>50</b>  | <b>-9</b>  | <b>-36</b> | <b>31</b>  | <b>13.06</b> |
|                           | <b>Temporal_Pole_Sup_L</b> | <b>-36</b> | <b>9</b>   | <b>-27</b> | <b>155</b> | <b>18.35</b> |
|                           | <b>Temporal_Pole_Sup_R</b> | <b>36</b>  | <b>18</b>  | <b>-30</b> | <b>20</b>  | <b>15.27</b> |
|                           | <b>Frontal_Mid_L</b>       | <b>-30</b> | <b>39</b>  | <b>45</b>  | <b>33</b>  | <b>12.16</b> |
|                           | <b>Frontal_Mid_L</b>       | <b>-39</b> | <b>15</b>  | <b>54</b>  | <b>24</b>  | <b>14.27</b> |
|                           | <b>Angular_R</b>           | <b>42</b>  | <b>-57</b> | <b>24</b>  | <b>18</b>  | <b>13.44</b> |
|                           | <b>Parietal_Sup_L</b>      | <b>-15</b> | <b>-66</b> | <b>48</b>  | <b>20</b>  | <b>13.71</b> |
|                           | <b>Parietal_Inf_L</b>      | <b>-24</b> | <b>-54</b> | <b>54</b>  | <b>14</b>  | <b>14.56</b> |

130 Abbreviation: sALFF, static amplitude of low-frequency fluctuation; dALFF, dynamic amplitude of low-frequency  
131 fluctuation.

132

133 Figure S3. The main effect of disease on sALFF

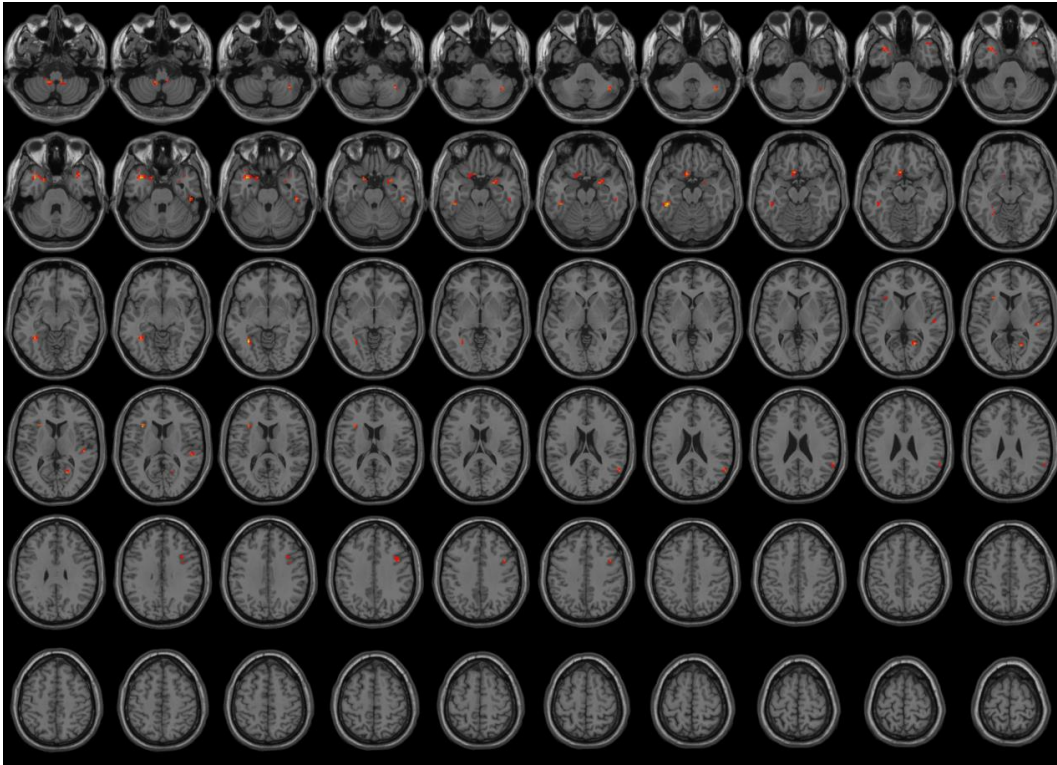

134

135 Abbreviation: sALFF, static amplitude of low-frequency fluctuation

136 Figure S4. The main effect of disease on dALFF variance

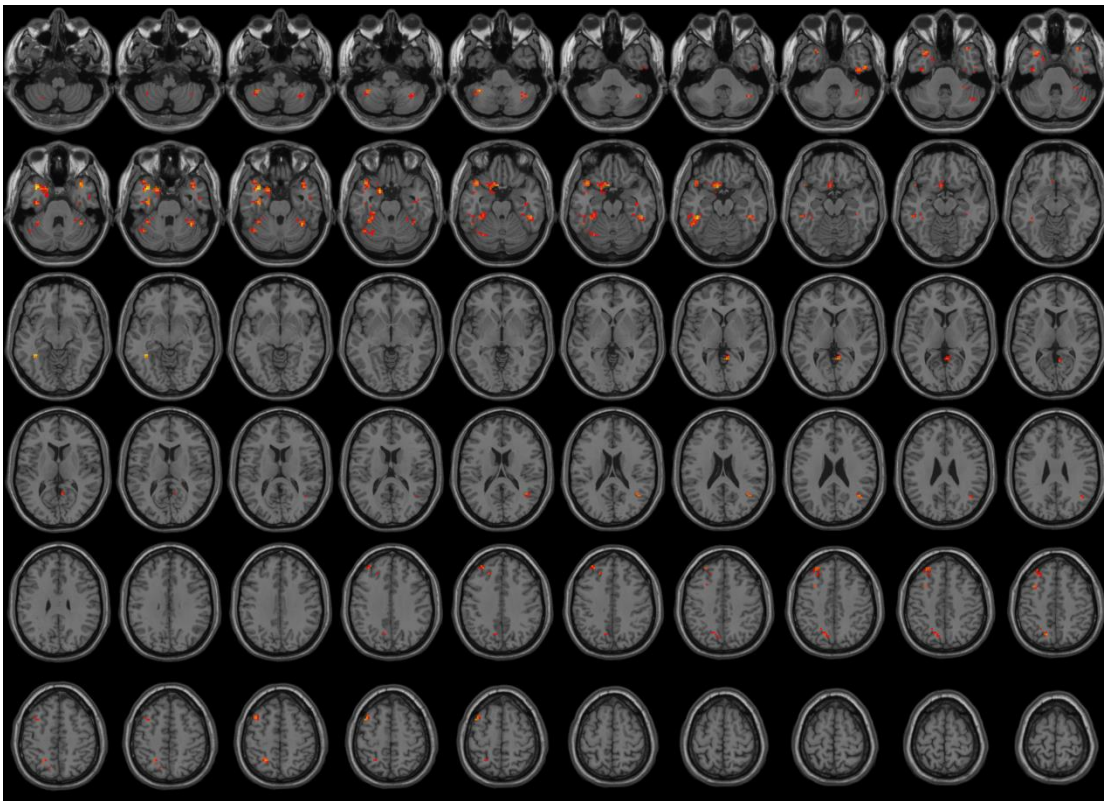

137

138 Abbreviation: dALFF, dynamic amplitude of low-frequency fluctuation.

139

140 **The main effect of sleep**

141 As for the sALFF analysis, the main effect of sleep on the ALFF was primarily located in  
 142 IPG, cerebellum, and motor-related region (Table S6, Figure S5). As for the dALFF variance  
 143 analysis, the main effect of sleep quality on the ALFF was primarily located in the cerebellum,  
 144 gyrus rectus and superior frontal gyrus (Table S6, Figure S6). The findings are in line with  
 145 previous studies reporting sleep relates with the motor memory consolidation and emotional  
 146 memory during sleep. This study suggested it widely involved in networks including  
 147 hippocampo-striato-thalamo-cortical networks <sup>13</sup>, hippocampus-amygdala system <sup>14</sup> and  
 148 hippocampal-cortical communication <sup>15</sup>. These findings are partially similar to previous  
 149 studies which reported that poor sleep quality was associated with reduced GM volume in the  
 150 frontal cortex, temporal, parietal regions, postcentral gyrus, precuneus and insula <sup>16-18</sup>.

151 Table S6. The main effect of sleep

| Neuroimaging Metrics | Cluster/peak regions | MNI coordinates |     |     | Extent | Max T |
|----------------------|----------------------|-----------------|-----|-----|--------|-------|
|                      |                      | X               | Y   | Z   |        |       |
| sALFF                | Cerebelum_Crus1_R    | 45              | -51 | -36 | 8      | 17.80 |
|                      | Temporal_Inf_R       | 45              | -54 | -9  | 9      | 21.66 |
|                      | Occipital_Sup_R      | 24              | -78 | 24  | 10     | 21.84 |
|                      | Precuneus_L          | -18             | -63 | 36  | 11     | 17.55 |
|                      | Parietal_Inf_L       | -54             | -30 | 42  | 8      | 18.51 |
|                      | Parietal_Inf_R       | 54              | -48 | 39  | 33     | 26.40 |
|                      | Postcentral_L        | -51             | -6  | 42  | 8      | 16.09 |

|                       |                           |            |            |            |           |              |
|-----------------------|---------------------------|------------|------------|------------|-----------|--------------|
|                       | <b>Postcentral_R</b>      | <b>30</b>  | <b>-42</b> | <b>54</b>  | <b>9</b>  | <b>17.15</b> |
|                       | <b>Supp_Motor_Area_R</b>  | <b>12</b>  | <b>15</b>  | <b>51</b>  | <b>9</b>  | <b>16.31</b> |
|                       | <b>Supp_Motor_Area_L</b>  | <b>-6</b>  | <b>9</b>   | <b>57</b>  | <b>7</b>  | <b>15.63</b> |
| <b>dALFF variance</b> | <b>Cerebellum_8_R</b>     | <b>30</b>  | <b>-42</b> | <b>-51</b> | <b>12</b> | <b>18.77</b> |
|                       | <b>Cerebellum_Crus2_R</b> | <b>45</b>  | <b>-69</b> | <b>-45</b> | <b>16</b> | <b>18.21</b> |
|                       | <b>Cerebellum_Crus1_R</b> | <b>45</b>  | <b>-51</b> | <b>-36</b> | <b>8</b>  | <b>16.24</b> |
|                       | <b>Cerebellum_3_R</b>     | <b>9</b>   | <b>-36</b> | <b>-18</b> | <b>9</b>  | <b>13.80</b> |
|                       | <b>Frontal_Sup_Orb_L</b>  | <b>-15</b> | <b>27</b>  | <b>-21</b> | <b>9</b>  | <b>17.84</b> |
|                       | <b>Rectus_R</b>           | <b>3</b>   | <b>27</b>  | <b>-15</b> | <b>34</b> | <b>21.88</b> |

152 Abbreviation: sALFF, static amplitude of low-frequency fluctuation; dALFF, dynamic amplitude of low-frequency  
 153 fluctuation.

154

155 Figure S5. The main effect of sleep on sALFF

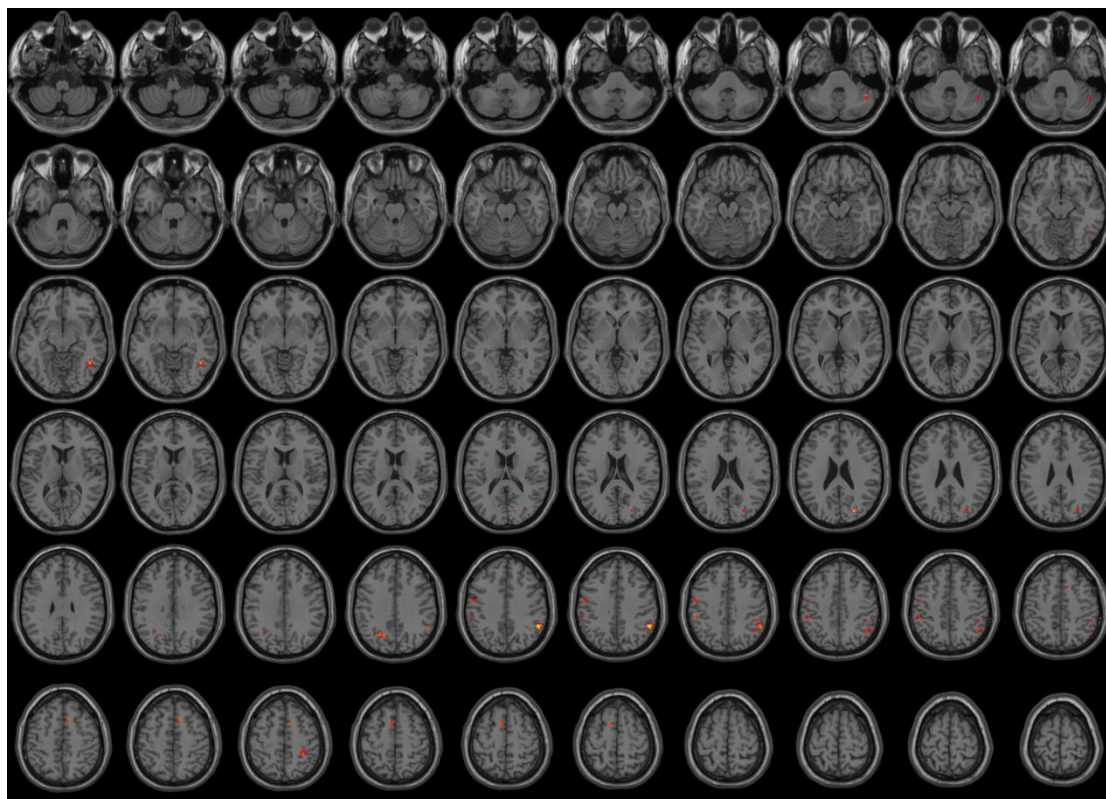

156



157 Abbreviation: sALFF, static amplitude of low-frequency fluctuation

158

159 Figure S6. The main effect of sleep on dALFF variance

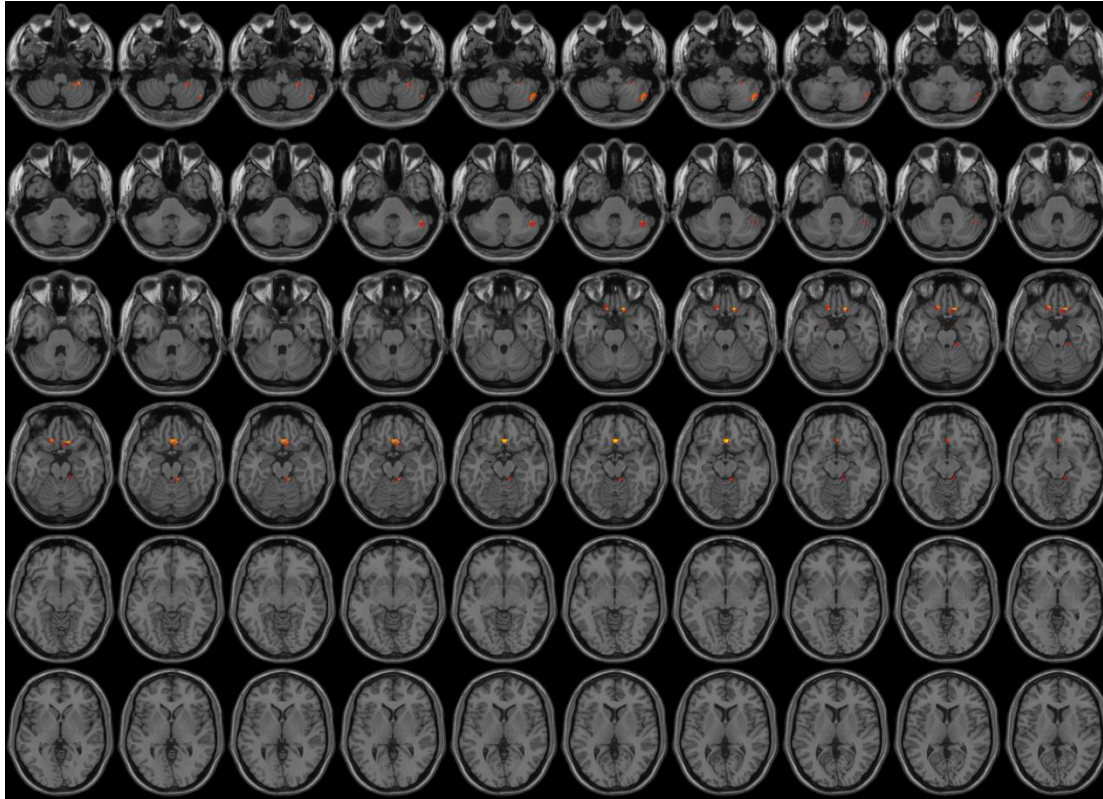

160

161 Abbreviation: dALFF, dynamic amplitude of low-frequency fluctuation.

162

163 **Supplementary Material 6: The interaction effects between sleep quality and disease**  
164 **severity in every ROI with the window size of 14 TR**

165 Here, we found the altered dALFF variance in superior temporal gyrus, hippocampus,  
166 gyrus rectus, supramarginal gyrus, insula, thalamus, and cerebellum. In subjects with poor  
167 sleep, we found an increased trend of dALFF variance along AD spectrum which suggested  
168 the decreased brain activity stability, especially involving the MCI to AD stage. As for the  
169 subjects with normal sleep, we found initially increased and then decreased dALFF variance  
170 along AD spectrum which may reflect the compensatory enhancement in the MCI stage and



171 decompensation in the AD stage (Figure S7).

172 Figure S7.

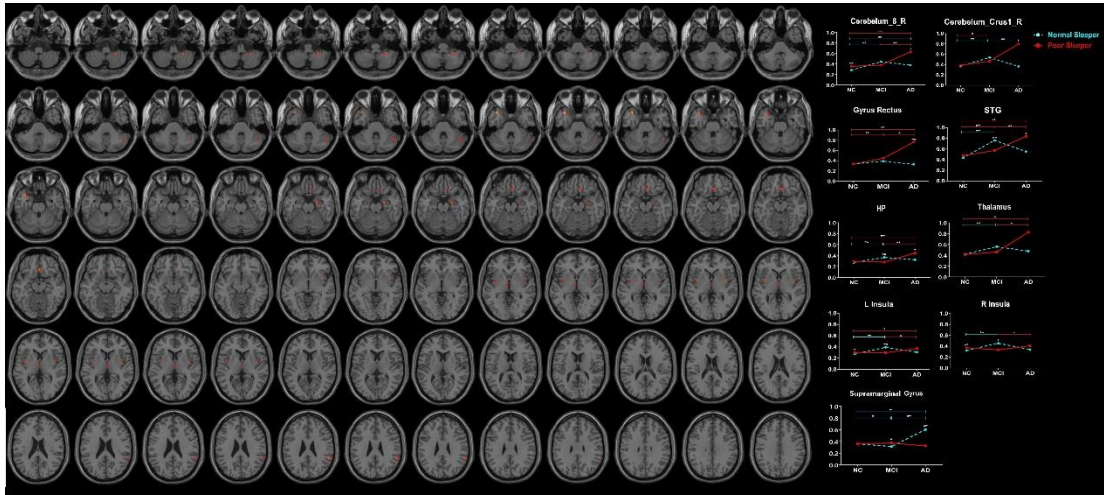

173

174 Abbreviation: STG, superior temporal gyrus; HP, hippocampus.

175

176 **Supplementary Material 7: The interaction effects between sleep quality and disease**  
 177 **severity with other window sizes**

178 To test the reliability of the dALFF results, we also examined the results with window  
 179 sizes of 20, 26, 33 TR (Table S7). The results are similar with the results under widow size of  
 180 14 TR, involving the cerebellum, temporal region, and insula.

181 Table S7. The interaction effects between sleep quality and disease severity with other  
 182 window sizes

| Window sizes | Cluster/peak regions | MNI coordinates |     |     | Extent | Max T |
|--------------|----------------------|-----------------|-----|-----|--------|-------|
|              |                      | X               | Y   | Z   |        |       |
|              | Cerebelum_8_R        | 27              | -48 | -48 | 9      | 9.60  |
|              | Cerebelum_Crus1_R    | 51              | -57 | -33 | 7      | 8.45  |
|              | Temporal_Pole_Sup_L  | -36             | 15  | -30 | 11     | 12.54 |

|       |                     |     |     |     |    |       |
|-------|---------------------|-----|-----|-----|----|-------|
| 20 TR | Temporal_Inf_L      | -39 | -33 | -15 | 7  | 8.72  |
|       | Frontal_Inf_Orb_L   | -27 | 21  | -24 | 7  | 12.46 |
|       | Rectus_R            | 6   | 27  | -18 | 13 | 10.25 |
|       | Insula_L            | -39 | -3  | 3   | 7  | 9.73  |
|       | Insula_R            | 39  | -3  | 6   | 8  | 10.73 |
| 26 TR | Cerebellum_8_R      | 27  | -45 | -48 | 11 | 10.16 |
|       | Cerebellum_Crus1_R  | 51  | -57 | -33 | 8  | 8.59  |
|       | Temporal_Pole_Sup_L | -36 | 15  | -30 | 7  | 10.81 |
|       | Rectus_R            | 6   | 27  | -18 | 9  | 10.06 |
|       | Insula_R            | 39  | -9  | 9   | 9  | 11.99 |
| 33 TR | Cerebellum_8_R      | 27  | -45 | -48 | 13 | 10.49 |
|       | Temporal_Inf_L      | -39 | 0   | -39 | 6  | 10.64 |
|       | Temporal_Pole_Sup_L | -36 | 15  | -30 | 6  | 10.01 |
|       | Hippocampus_L       | -36 | -15 | -15 | 6  | 8.89  |
|       | Rectus_R            | 6   | 27  | -18 | 9  | 9.65  |
|       | Insula_R            | 39  | -9  | 9   | 8  | 11.73 |

183

184 **Supplementary Material 8: The interaction effects between sleep quality and disease**  
185 **severity by adding GDS as a covariate**

186 Previous study reported that sleep disturbance and depressive symptoms might affect  
187 each other. To be specific, whether sleep disturbance may represent early symptoms of AD,  
188 or induce cognitive impairment through alterations in sleep-dependent memory

189 consolidation or through an increase of depressive symptoms is still under debate <sup>19,20</sup>. Here,  
190 to explore the possible effect of GDS, we repeated our full factorial analysis by adding GDS  
191 as a covariate. To be specific, a 3 × 2 full factorial design, with groups (NC, MCI, and AD)  
192 and sleep state (NS and PS) as between-participant factors was performed to explore the  
193 interactions between sleep disturbance and disease severity on brain function (dALFF in a  
194 whole-brain voxel-wise way). GDS, age, gender, education and FD were employed as  
195 covariates. Then, F test was performed by setting the threshold at P<0.001 at a voxel level,  
196 with P<0.05 at the cluster level, corrected for multiple comparisons using the Gaussian  
197 random field (GRF) method. Results remained largely unchanged (Figure S9, Table S8),  
198 suggesting that GDS has no significant effect on the results.  
199 Table S8. The difference of dALFF variance of 6 groups by adding GDS as a covariate

| Neuroimaging<br>Metrics   | Cluster/peak regions | MNI coordinates |     |     | Extent | Max T |
|---------------------------|----------------------|-----------------|-----|-----|--------|-------|
|                           |                      | X               | Y   | Z   |        |       |
| <b>dALFF<br/>variance</b> | Cerebelum_Crus1_R    | 48              | -57 | -33 | 8      | 8.01  |
|                           | Cerebelum_8_R        | 24              | -45 | -45 | 10     | 9.31  |
|                           | Insula_R             | 39              | -3  | 6   | 9      | 10.41 |
|                           | Insula_L             | -39             | -3  | 3   | 9      | 10.45 |
|                           | Temporal_Pole_Sup_L  | -36             | 15  | -30 | 13     | 14.32 |
|                           | Hippocampal_R        | 21              | -9  | -21 | 9      | 10.31 |
|                           | Rectus_R             | 6               | 27  | -18 | 16     | 10.24 |
|                           | SupraMarginal_R      | 57              | -42 | 27  | 9      | 10.02 |

200 Abbreviation: dALFF, dynamic amplitude of low-frequency fluctuation; GDS, Geriatric

201 Depression Scale

202 Figure S8. The difference of dALFF variance of 6 groups by adding GDS as a covariate

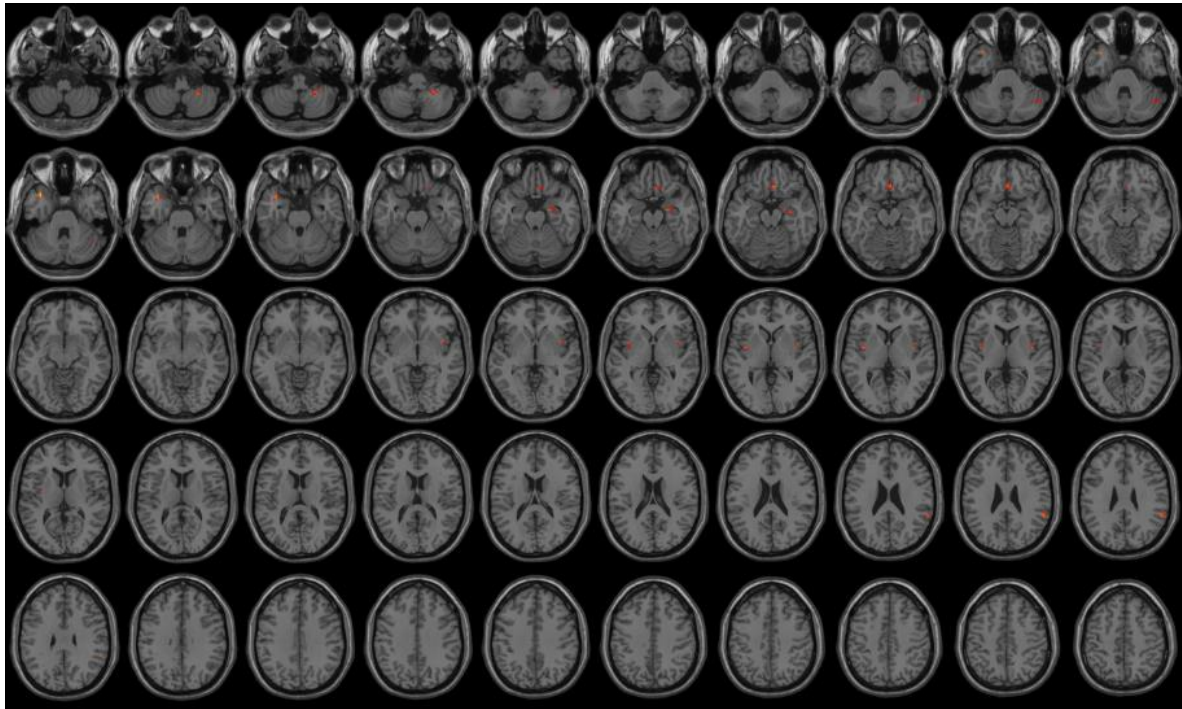

203

204 Abbreviation: GDS, Geriatric Depression Scale; dALFF, dynamic amplitude of low-frequency  
205 fluctuation

206

## 207 Reference

- 208 1 Cummings, J. L. *et al.* The Neuropsychiatric Inventory: comprehensive assessment of psychopathology  
209 in dementia. *Neurology* **44**, 2308-2314 (1994).
- 210 2 Kaufer, D. I. *et al.* Validation of the NPI-Q, a brief clinical form of the Neuropsychiatric Inventory. *J*  
211 *Neuropsychiatry Clin Neurosci* **12**, 233-239, doi:10.1176/jnp.12.2.233 (2000).
- 212 3 Sheikh JI, Y. J. Geriatric Depression Scale (GDS): recent evidence and development of a shorter version.  
213 *In: Brink TL, ed. Clinical Gerontology: A Guide to Assessment and Intervention. New York, NY: The*  
214 *Haworth Press; , 165–173 (1986).*
- 215 4 Bondi MW, E. E., Jak AJ, Clark LR, DelanoWood L, McDonald CR, Nation DA, Libon DJ, Au R, Galasko D,  
216 Salmon DP. Neuropsychological criteria for mild cognitive impairment improves diagnostic precision,  
217 biomarker associations, and progression rates. *J Alzheimers Dis* **42**, 275-289 (2014).
- 218 5 G. McKhann, D. D., M. Folstein, R. Katzman, D. Price, E.M. Stadlan. Clinical diagnosis of Alzheimer's  
219 disease: report of the NINCDS-ADRDA Work Group under the auspices of Department of Health and  
220 Human Services Task Force on Alzheimer's Disease. *Neurology* **34**, 939-944 (1984).
- 221 6 Mecca, A. P. *et al.* Sleep Disturbance and the Risk of Cognitive Decline or Clinical Conversion in the  
222 ADNI Cohort. *Dement Geriatr Cogn Disord* **45**, 232-242, doi:10.1159/000488671 (2018).

- 223 7 Moran, M. *et al.* Sleep disturbance in mild to moderate Alzheimer's disease. *Sleep Med* **6**, 347-352,  
224 doi:10.1016/j.sleep.2004.12.005 (2005).
- 225 8 Benedict, C. *et al.* Self-reported sleep disturbance is associated with Alzheimer's disease risk in men.  
226 *Alzheimers Dement* **11**, 1090-1097, doi:10.1016/j.jalz.2014.08.104 (2015).
- 227 9 Shi L, C. S., Ma MY, Bao YP, Han Y, Wang YM, Shi J, Vitiello MV, Lu L. Sleep disturbances increase the risk  
228 of dementia: A systematic review and meta-analysis. *Sleep Med Rev* **40**, 4-16 (2018).
- 229 10 Liguori C, M. N., Nuccetelli M, Izzi F, Bernardini S, Placidi F. Cerebrospinal Fluid Orexin Levels and  
230 Nocturnal Sleep Disruption in Alzheimer's Disease Patients Showing Neuropsychiatric Symptoms. *J*  
231 *Alzheimers Dis* **66**, 993-999 (2018).
- 232 11 Terum TM, T. I., Rongve A, Aarsland D, Svendsboe E, Andersen JR. The association between specific  
233 neuropsychiatric disturbances in people with Alzheimer's disease and dementia with Lewy bodies and  
234 carer distress. *Int J Geriatr Psychiatry* **34**, 1421-1428 (2019).
- 235 12 Yuen K, R.-R. N., Verhoeff NPLG, Kumar S, Gallagher D, Flint AJ, Herrmann N, Pollock BG, Mulsant BH,  
236 Rajji TK, Voineskos AN, Fischer CE, Mah L; PACt-MD Study Group. Association between Sleep  
237 Disturbances and Medial Temporal Lobe Volume in Older Adults with Mild Cognitive Impairment Free  
238 of Lifetime History of Depression. *J Alzheimers Dis* **69**, 413-421 (2019).
- 239 13 Boutin, A. *et al.* Transient synchronization of hippocampo-striato-thalamo-cortical networks during  
240 sleep spindle oscillations induces motor memory consolidation. *Neuroimage* **169**, 419-430,  
241 doi:10.1016/j.neuroimage.2017.12.066 (2018).
- 242 14 Girardeau, G., Inema, I. & Buzsaki, G. Reactivations of emotional memory in the  
243 hippocampus-amygdala system during sleep. *Nat Neurosci* **20**, 1634-1642, doi:10.1038/nn.4637  
244 (2017).
- 245 15 Alger, S. E., Chambers, A. M., Cunningham, T. & Payne, J. D. The role of sleep in human declarative  
246 memory consolidation. *Curr Top Behav Neurosci* **25**, 269-306, doi:10.1007/7854\_2014\_341 (2015).
- 247 16 Sexton, C. E., Storsve, A. B., Walhovd, K. B., Johansen-Berg, H. & Fjell, A. M. Poor sleep quality is  
248 associated with increased cortical atrophy in community-dwelling adults. *Neurology* **83**, 967-973,  
249 doi:10.1212/WNL.0000000000000774 (2014).
- 250 17 Branger, P. *et al.* Relationships between sleep quality and brain volume, metabolism, and amyloid  
251 deposition in late adulthood. *Neurobiol Aging* **41**, 107-114, doi:10.1016/j.neurobiolaging.2016.02.009  
252 (2016).
- 253 18 Sanchez-Espinosa MP, A. M., Cantero JL. Sleep deficits in mild cognitive impairment are related to  
254 increased levels of plasma amyloid- $\beta$  and cortical thinning. *Neuroimage* **98**, 395-404 (2014).
- 255 19 H.A. Keage, S. B., K.L. Yang, K. Morgan, C. Brayne, F.E. Matthews. What sleep characteristics predict  
256 cognitive decline in the elderly? *Sleep Med* **13**, 886-892 (2012).
- 257 20 Jelacic M, B. H., Ponds RW, Van Boxtel MP, Houx PJ, Jolles J. Subjective sleep problems in later life as  
258 predictors of cognitive decline. Report from the Maastricht Ageing Study (MAAS). *Int J Geriatr*  
259 *Psychiatry* **17**, 73-77 (2002).

260
